# Supplementary material for: Convergence and equilibrium in molecular dynamics simulations
Source: PubMed Central journal article supplement (PMC10850365; doi:10.1038/s42004-024-01114-5), 2024-02-07
Supplement: 42004_2024_1114_MOESM3_ESM.pdf [file 42004_2024_1114_MOESM3_ESM.pdf]

# Description of Additional Supplementary Files

**File name:** Supplementary Data 1

**Description:** Dialanine initial structure

**File name:** Supplementary Data 2

**Description:** Dialanine final structure

**File name:** Supplementary Data 3

**Description:** Trp-cage initial structure

**File name:** Supplementary Data 4

**Description:** Trp-cage final structure

**File name:** Supplementary Data 5

**Description:** VHP initial structure

**File name:** Supplementary Data 6

**Description:** VHP initial structure

**File name:** Supplementary Data 7

**Description:** GAAC initial structure

**File name:** Supplementary Data 8

**Description:** GAAC final structure

**File name:** Supplementary Data 9

**Description:** Barnase initial structure

**File name:** Supplementary Data 10

**Description:** Barnase final structure

**File name:** Supplementary Data 11

**Description:** Elastase initial structure

**File name:** Supplementary Data 12

**Description:** Elastase final structure

**File name:** Supplementary Data 13

**Description:** PGK initial structure

**File name:** Supplementary Data 14

**Description:** PGK final structure

**File name:** Supplementary Data 15

**Description:** 3CL<sup>pro</sup> initial structure

**File name:** Supplementary Data 16

**Description:** 3CL<sup>pro</sup> final structure

**File name:** Supplementary Movie 1

**Description:** Dialanine trajectory

**File name:** Supplementary Movie 2

**Description:** PGK trajectory

**File name:** Supplementary Movie 3

**Description:** 3CL<sup>pro</sup> trajectory

**File name:** Supplementary Movie 4

**Description:** Trp-cage trajectory

**File name:** Supplementary Movie 5

**Description:** VHP trajectory

**File name:** Supplementary Movie 6

**Description:** GAAC trajectory

**File name:** Supplementary Movie 7

**Description:** Barnase trajectory

**File name:** Supplementary Movie 8

**Description:** Elastase trajectory
